# Supplementary material
Source: HighWire-hosted journal article supplement (http://www.ajnr.org/highwire/filestream/79302/field_highwire_adjunct_files/0/20-01190.pdf)
Supplement: 20-01190.pdf [file 20-01190.pdf]

**Online Table 1: Clinical and laboratory characteristics of the patients<sup>a</sup>**

| Patient                | Age (yr) | Sex | No. of Days Patient Ventilated | ARDS Score | LOS | DC mRS | DC Disposition | PC Adm | PC Nadir | D-Dimer Adm | D-Dimer Peak | LDH Adm | LDH Peak | Fib Adm | Fib Nadir | INR Adm | INR Peak | ESR Adm | ESR Peak | CRP Adm | CRP Peak | Ferritin Adm | Ferritin Peak | IL-6 Adm | IL-6 Peak |
|------------------------|----------|-----|--------------------------------|------------|-----|--------|----------------|--------|----------|-------------|--------------|---------|----------|---------|-----------|---------|----------|---------|----------|---------|----------|--------------|---------------|----------|-----------|
|                        |          |     |                                |            |     |        |                |        |          |             |              |         |          |         |           |         |          |         |          |         |          |              |               |          |           |
| Patient 1              | 58, M    |     | 52                             | Severe     | 52  | 5      | SNF            | 207    | 43       | 5247        | >10,000      | 855     | 904      | 690     | 201       | 1.3     | 1.5      | 120     | 120      | 139     | 260.5    | 71           | 4915          | 99       | 99        |
| Patient 2              | 65, M    |     | 46                             | Moderate   | 49  | 6      | Died           | 195    | 111      | 2226        | >10,000      | 518     | 1015     | 814     | 326       | 1.3     | 1.3      | 100     | 114      | 314.5   | 329.7    | 1571         | 3894          | 30       | 30        |
| Patient 3              | 69, M    |     | 24                             | Moderate   | 25  | 6      | Died           | 295    | 149      | 3147        | >10,000      | 849     | 1901     | 428     | 428       | 1.4     | 1.6      | 72      | >140     | 75.8    | 194      | 680.9        | 1466.9        | 33       | 109       |
| Patient 4              | 38, M    |     | 49                             | Moderate   | 52  | 5      | Admitted       | 189    | 124      | 3710        | 5959         | 317     | 727      | 821     | 484       | 1.1     | 1.6      | 106     | 106      | 106.6   | 388      | 505          | 4488          | 31       | 31        |
| Patient 5              | 61, M    |     | 45                             | Severe     | 46  | 5      | Admitted       | 214    | 142      | 232         | 7290         | 508     | 4071     | >700    | >700      | 1.16    | 9.95     | 49      | 129      | 120.25  | 332.74   | 2356         | 17,911        | 21       | 164       |
| Patient 6              | 48, M    |     | 27                             | Mild       | 35  | 5      | Admitted       | 233    | 108      | 201         | >10,000      | 316     | 1320     | 597     | 547       | 1.1     | 1.4      | 43      | 43       | 29      | 396.1    | 237          | 14,813        | <5       | <5        |
| Patient 7              | 61, M    |     | 0                              | NA         | 27  | 3      | Home           | 183    | 146      | 1780        | 1971         | 207     | 493      | >700    | 629       | 1.06    | 1.44     | 45      | 98       | 30.88   | 339.29   | 1429         | 16,143        | NA       | NA        |
| Patient 8 <sup>a</sup> | 50, M    |     | 44                             | Severe     | 46  | 5      | SNF            | 157    | 77       | 333         | 3118         | 476     | 926      | 788     | 629       | 1.1     | 1.2      | 116     | >140     | 267     | 428      | 1534.5       | 2443          | 49       | 49        |

**Note:**—Adm indicates admission; DC, discharge; Fib, fibrinogen; PC, platelet count; SNF, skilled nursing facility; NA, not applicable.

<sup>a</sup>Normal CRP = 0.0–3.0 mg/L; normal D-dimer level = <230 ng/mL; normal ESR = 0–10 mm/h; normal ferritin level = 8.0–388.0 ng/mL; normal fibrinogen level = 150–450 mg/dL; normal IL-6 level = ≤5 pg/mL; normal INR = 0.9–1.1; normal LDH = 84–246 IU/L; normal platelet count = 150–400 × 10<sup>3</sup>/μL. Initial brain imaging published as a case report in Radmanesh et al.<sup>50</sup>

**Online Table 2: Brain imaging characteristics<sup>a</sup>**

| Patient                | Race    | Indication for MRI | Days on Ventilator before First MRI | LOS until First MRI | GCS at the Time of First MRI | Initial MR imaging |             |            | Follow-Up MR imaging |                  |                   |                |                                         |                                      |                   |   |   |   |   |   |   |   |   |   |   |   |
|------------------------|---------|--------------------|-------------------------------------|---------------------|------------------------------|--------------------|-------------|------------|----------------------|------------------|-------------------|----------------|-----------------------------------------|--------------------------------------|-------------------|---|---|---|---|---|---|---|---|---|---|---|
|                        |         |                    |                                     |                     |                              | Posterior MH       | Predominant | Brain Stem | Basal Ganglia        | Cerebellum + MCP | LOS until F/U MRI | GCS on F/U MRI | Increased and More Confluent WM Lesions | Cystic Changes of Initial WM Lesions | Brain Volume Loss |   |   |   |   |   |   |   |   |   |   |   |
| Patient 1              | Chinese | AMS                | 26                                  | 26                  | 3                            | +                  | +           | +          | +                    | +                | +                 | +              | +                                       | +                                    | +                 | + | + | + | + | + | + | + | + | + | + |   |
| Patient 2              | White   | Focal weakness     | 23                                  | 26                  | 11                           | +                  | +           | +          | +                    | +                | +                 | +              | +                                       | +                                    | +                 | + | + | + | + | + | + | + | + | + | + | + |
| Patient 3              | Other   | AMS                | 17                                  | 18                  | 3                            | +                  | +           | +          | +                    | +                | +                 | +              | +                                       | +                                    | +                 | + | + | + | + | + | + | + | + | + | + | + |
| Patient 4              | Other   | AMS                | 28                                  | 30                  | 6                            | +                  | +           | +          | +                    | +                | +                 | +              | +                                       | +                                    | +                 | + | + | + | + | + | + | + | + | + | + | + |
| Patient 5              | Other   | AMS                | 24                                  | 25                  | 3                            | +                  | +           | +          | +                    | +                | +                 | +              | +                                       | +                                    | +                 | + | + | + | + | + | + | + | + | + | + | + |
| Patient 6              | AA      | AMS                | 2                                   | 10                  | 8                            | +                  | +           | +          | +                    | +                | +                 | +              | +                                       | +                                    | +                 | + | + | + | + | + | + | + | + | + | + | + |
| Patient 7              | White   | AMS                | NA                                  | 22                  | 15                           | +                  | +           | +          | +                    | +                | +                 | +              | +                                       | +                                    | +                 | + | + | + | + | + | + | + | + | + | + | + |
| Patient 8 <sup>a</sup> | Chinese | AMS                | 20                                  | 22                  | 4                            | +                  | +           | +          | +                    | +                | +                 | +              | +                                       | +                                    | +                 | + | + | + | + | + | + | + | + | + | + | + |

**Note:**—AMS indicates altered mental status; F/U, follow-up; LOS, length of stay; MCP, middle cerebellar peduncle; MH, microhemorrhage; AA, African-american; NA, not applicable.

<sup>a</sup>Initial brain imaging published as a case report in Radmanesh et al.<sup>50</sup>
